# Supplementary material for: High Frequency of Enterocytozoon bieneusi Genotype WL12 Occurrence among Immunocompromised Patients with Intestinal Microsporidiosis
Source: J Fungi (Basel). 2021 Feb 24;7(3):161. doi: 10.3390/jof7030161 (PMC7996336; doi:10.3390/jof7030161)
Supplement: Supplementary file 1 [file jof-07-00161-s001.zip › Tables S1 and S2_revised.xlsx]

## Sheet: Table S1
Patient #	Sampling date	Number of samples	Sex	Age	Geographic origin	Place of hospitalization	Duration of stay (days)	Underlying disease	Chronic diarrhea	Microsporidia infection	Identified species	E. bieneusi genotype
Patient 1	2014-01-01	1	Male	3	BEJA	2	38	Bone marrow transplant	No	No
Patient 2	2014-01-02	1	Male	23	SFAX	1	17	HIV infection	No	No
Patient 3	2014-01-01	1	Female	42	TUNIS	1	8	HIV infection	No	No
Patient 4	2014-01-01	1	Male	18	TUNIS	4	7	Not specified	Yes	No
Patient 5	2014-02-01	1	Female	32	NABEUL	1	21	HIV infection	No	No
Patient 6	2014-02-01	1	Male	34	TUNIS	1	16	Kidney transplant	Yes	No
Patient 7	2014-02-01	1	Male	48	IVORY COAST	1	6	HIV infection	Yes	No
Patient 8	2014-02-01	2	Male	28	JENDOUBA	1	14	Kidney transplant	Yes	No
Patient 9	2014-02-01	1	Female	35	TUNIS	1	25	HIV infection	Yes	Yes	Enterocytozoon bieneusi	A/B/S5
Patient 10	2014-02-01	1	Male	5	BEN AROUS	2	52	Bone Marrow transplant	No	No
Patient 11	2014-03-01	3	Male	31	NABEUL	1	83	HIV infection	Yes	Yes	Enterocytozoon bieneusi	Peru8/WL12
Patient 12	2014-03-01	1	Male	38	SOUSSE	1	6	HIV infection	No	No
Patient 13	2014-03-01	1	Female	38	MALI	1	10	HIV infection	No	No
Patient 14	2014-03-01	1	Male	31	BIZERTE	1	7	HIV infection	Yes	No
Patient 15	2014-04-01	1	Female	46	TUNIS	1	21	HIV infection	Yes	Yes	Enterocytozoon bieneusi	WL12
Patient 16	2014-04-01	1	Female	6	TUNIS	1	8	Kidney transplant	Yes	No
Patient 17	2014-04-01	1	Female	4	TUNIS	2	8	Bone marrow transplant	No	No
Patient 18	2014-05-01	2	Female	8	SOUSSE	2	10	Bone marrow transplant	Yes	No
Patient 19	2014-05-01	1	Male	30	TUNIS	1	14	HIV infection	Yes	No
Patient 20	2014-05-01	2	Male	37	CAMEROON	1	8	HIV infection	Yes	No
Patient 21	2014-05-01	1	Male	39	BEJA	1	13	HIV infection	Yes	No
Patient 22	2014-05-01	3	Male	31	TUNIS	1	5	HIV infection	Yes	No
Patient 23	2014-05-01	9	Male	14	KAIROUAN	2	116	Bone marrow transplant	Yes	Yes	Enterocytozoon bieneusi	WL12
Patient 24	2014-06-01	1	Female	27	BEN AROUS	1	27	HIV infection	Yes	No
Patient 25	2014-06-01	1	Female	24	TUNIS	1	6	HIV infection	Yes	No
Patient 26	2014-06-01	2	Female	7	TUNIS	2	43	Bone marrow transplant	Yes	Yes	Encephalitozoon intestinalis Encephalitozoon hellem
Patient 27	2014-06-01	1	Male	12	SIDI BOUZID	2	26	Bone marrow transplant	No	No
Patient 28	2014-06-01	1	Male	50	BEJA	1	18	HIV infection	Yes	No
Patient 29	2014-07-01	1	Female	34	KEF	1	13	HIV infection	Yes	No
Patient 30	2014-07-01	1	Female	3	TUNIS	2	5	Bone marrow transplant	Yes	No
Patient 31	2014-07-01	1	Male	4	HAMMAMET	2	39	Bone marrow transplant	Yes	No
Patient 32	2014-07-01	1	Male	2	TUNIS	4	28	Not specified	No	No
Patient 33	2014-07-01	1	Male	41	GAFSA	1	32	HIV infection	Yes	No
Patient 34	2014-08-01	3	Female	24	TUNIS	1	92	HIV infection	Yes	Yes	Enterocytozoon bieneusi	HNM-III
Patient 35	2014-08-01	2	Female	43	BEJA	1	24	Kidney transplant	Yes	No
Patient 36	2014-09-01	2	Male	5	MANOUBA	2	12	Bone marrow transplant	No	No
Patient 37	2014-09-01	2	Female	46	BEJA	1	77	Kidney transplant	Yes	Yes	Enterocytozoon bieneusi	Type III
Patient 38	2014-09-01	2	Male	41	SOUSSE	1	17	HIV infection	Yes	No
Patient 39	2014-10-01	1	Female	28	SFAX	2	24	Bone marrow transplant	No	No
Patient 40	2014-10-01	1	Male	3	SFAX	2	5	Bone marrow transplant	No	No
Patient 41	2014-10-01	1	Female	13	TUNIS	2	10	Bone marrow transplant	No	No
Patient 42	2014-10-01	1	Female	26	MAHDIA	1	25	Kidney transplant	Yes	No
Patient 43	2014-10-01	1	Male	42	BIZERTE	1	10	Kidney transplant	No	No
Patient 44	2014-10-01	1	Male	62	GAFSA	1	6	HIV infection	No	No
Patient 45	2014-10-01	1	Male	7	TUNIS	2	36	Bone marrow transplant	No	No
Patient 46	2014-10-01	1	Female	54	KAIROUAN	1	46	HIV infection	No	No
Patient 47	2014-10-01	1	Male	7	BEJA	1	13	HIV infection	No	No
Patient 48	2014-11-01	3	Female	35	TUNIS	1	7	HIV infection	Yes	No
Patient 49	2014-11-01	1	Female	26	TATAOUINE	1	27	HIV infection	Yes	Yes	Enterocytozoon bieneusi	WL12
Patient 50	2014-11-01	1	Male	Not specified	MANOUBA	4	34	Not specified	No	No
Patient 51	2014-11-01	1	Female	21	MONASTIR	3	10	Not specified	No	No
Patient 52	2014-11-01	1	Male	38	TUNIS	1	16	HIV infection	Yes	No
Patient 53	2014-12-01	1	Female	60	HAMMAMET	1	8	HIV infection	No	No
Patient 54	2014-12-01	1	Female	19	SFAX	2	17	Bone marrow transplant	Yes	No
Patient 55	2014-12-01	5	Male	16	SIDI BOUZID	2	54	Bone marrow transplant	No	Yes	Enterocytozoon bieneusi	WL12
Patient 56	2014-12-01	2	Male	32	ZAGHOUAN	1	34	Kidney transplant	Yes	Yes	Enterocytozoon bieneusi	Peru8/WL12
Patient 57	2015-01-01	2	Male	2	TUNIS	4	3	Not specified	No	No
Patient 58	2015-01-01	2	Female	45	BEN AROUS	1	12	HIV infection	No	No
Patient 59	2015-01-01	2	Male	Not specified	TUNIS	4	16	Not specified	No	No
Patient 60	2015-02-01	3	Male	4	TUNIS	2	22	Bone marrow transplant	No	No
Patient 61	2015-02-01	1	Male	56	TATAOUINE	1	23	HIV infection	No	No
Patient 62	2015-02-01	1	Female	19	TUNIS	2	17	Bone marrow transplant	No	No
Patient 63	2015-02-01	2	Female	12	TUNIS	2	5	Bone marrow transplant	No	No
Patient 64	2015-02-01	2	Male	3	BEN AROUS	4	11	Not specified	No	No
Patient 65	2015-02-01	1	Female	Not specified	TUNIS	2	92	Bone marrow transplant	No	No
Patient 66	2015-03-01	1	Male	13	SFAX	2	24	Bone marrow transplant	No	No
Patient 67	2015-03-01	1	Female	2	SOUSSE	2	10	Bone marrow transplant	No	No
Patient 68	2015-03-01	3	Male	49	MEDENINE	1	27	HIV infection	No	No
Patient 69	2015-03-01	1	Male	36	TUNIS	1	15	HIV infection	No	No
Patient 70	2015-03-01	1	Female	37	KEF	1	26	HIV infection	Yes	No
Patient 71	2015-04-01	1	Male	45	SOUSSE	1	6	HIV infection	No	No
Patient 72	2015-04-01	2	Female	47	TUNIS	2	26	Bone marrow transplant	No	No
Patient 73	2015-04-01	2	Female	24	TUNIS	2	8	Bone marrow transplant	Yes	No
74	2015-04-01	2	Female	Not specified	TUNIS	1	101	HIV infection	Yes	Yes	Enterocytozoon bieneusi	WL12
75	2015-04-01	1	Male	29	TUNIS	2	11	Bone marrow transplant	No	No				73
76	2015-04-01	1	Male	Not specified	BIZERTE	2	72	Bone marrow transplant	No	No
77	2015-04-01	1	Male	28	TUNIS	2	39	Bone marrow transplant	No	No
78	2015-05-01	2	Male	77	TUNIS	1	32	HIV infection	No	No
79	2015-06-01	1	Female	22	TUNIS	1	14	HIV infection	No	No
80	2015-06-01	2	Female	40	TUNIS	1	34	HIV infection	No	No
81	2015-06-01	2	Male	41	TUNIS	1	25	HIV infection	Yes	No
82	2015-07-01	1	Female	2	NABEUL	2	58	Bone marrow transplant	No	No
83	2015-07-01	1	Male	81	JENDOUBA	1	7	HIV infection	No	No
84	2015-07-01	1	Female	3	KASSERINE	2	11	Bone marrow transplant	No	No
85	2015-08-01	3	Female	20	TUNIS	2	192	Bone marrow transplant	Yes	Yes	Enterocytozoon bieneusi	WL12
86	2015-08-01	1	Male	29	TUNIS	1	6	HIV infection	Yes	No
87	2015-08-01	1	Male	49	NABEUL	1	33	HIV infection	Yes	Yes	Enterocytozoon bieneusi	WL12
88	2015-09-01	1	Male	41	MEDENINE	1	9	HIV infection	No	No
89	2015-09-01	1	Male	23	ZARZIS	1	25	HIV infection	No	No
90	2015-10-01	1	Female	10	MANOUBA	2	37	Bone marrow transplant	No	No
91	2015-10-01	1	Female	Not specified	BEN AROUS	4	5	Not specified	No	No
92	2015-10-01	1	Female	2	TUNIS	2	3	Bone marrow transplant	No	No
93	2015-10-01	1	Male	48	TUNIS	2	12	Bone marrow transplant	No	No
94	2015-11-01	8	Female	35	TUNIS	1	34	HIV infection	Yes	Yes	Enterocytozoon bieneusi	D
95	2015-11-01	2	Male	40	TUNIS	1	10	HIV infection	No	No
96	2015-12-01	1	Male	26	IVORY COAST	1	12	HIV infection	No	No
97	2015-12-01	1	Male	58	KEF	2	7	Bone marrow transplant	Yes	No
98	2015-12-01	1	Male	43	MALI	1	5	HIV infection	Yes	No
99	2015-12-01	1	Male	14	SFAX	2	28	Bone marrow transplant	No	No
100	2015-12-01	1	Female	8	GAFSA	2	8	Bone marrow transplant	No	No
101	2016-01-01	1	Male	53	TUNIS	1	8	HIV infection	No	No
102	2016-01-01	1	Male	62	TUNIS	2	32	Bone marrow transplant	Yes	No
103	2016-01-01	1	Male	Not specified	BEJA	3	8	Not specified	No	No
104	2016-01-01	1	Female	5	TUNIS	2	12	Bone marrow transplant	No	No
105	2016-02-01	1	Male	26	TUNIS	1	21	HIV infection	Yes	No
106	2016-02-01	2	Male	5	TUNIS	2	14	Bone marrow transplant	No	No
107	2016-02-01	1	Male	30	BIZERTE	1	5	Kidney transplant	Yes	No
108	2016-02-01	2	Male	3	SFAX	2	10	Bone marrow transplant	No	No
109	2016-02-01	2	Male	39	JENDOUBA	1	37	HIV infection	No	No
110	2016-02-01	1	Female	1	TUNIS	4	21	Not specified	No	No
111	2016-02-01	1	Female	32	KEF	1	24	Kidney transplant	No	No
112	2016-03-01	2	Male	32	NABEUL	1	19	HIV infection	Yes	No
113	2016-03-01	2	Female	6	TUNIS	2	23	Bone marrow transplant	No	No
114	2016-03-01	2	Male	48	CAMEROON	1	12	HIV infection	No	No
115	2016-03-01	3	Female	39	SOUSSE	1	14	HIV infection	No	No
116	2016-03-01	3	Female	13	TUNIS	2	16	Bone marrow transplant	Yes	No
117	2016-03-01	2	Male	2	TUNIS	2	13	Bone marrow transplant	No	No
118	2016-03-01	1	Male	11	SIDI BOUZID	2	6	Bone marrow transplant	No	No
119	2016-03-01	1	Male	40	CONGO	2	8	Bone marrow transplant	No	No
120	2016-03-01	1	Male	6	TUNIS	2	36	Bone marrow transplant	Yes	No
121	2016-04-01	3	Female	Not specified	TUNIS	1	27	HIV infection	Yes	Yes	Enterocytozoon bieneusi Encephalitozoon intestinalis Encephalitozoon cuniculi	WL12
122	2016-04-01	1	Female	43	KAIROUAN	2	58	Bone marrow transplant	No	No
123	2016-04-01	1	Female	64	CAMEROON	1	5	HIV infection	No	No
124	2016-04-01	1	Male	51	TUNIS	1	6	HIV infection	No	No
125	2016-04-01	1	Female	30	TUNIS	3	20	Not specified	Yes	No
126	2016-04-01	1	Male	Not specified	ZAGHOUAN	3	12	Not specified	No	No
127	2016-04-01	2	Male	36	MEDENINE	2	4	Bone marrow transplant	No	No
128	2016-05-01	1	Male	Not specified	SFAX	3	10	Not specified	No	No
129	2016-05-01	1	Male	Not specified	TUNIS	4	3	Not specified	No	No
130	2016-06-01	2	Male	23	TUNIS	1	21	HIV infection	Yes	No
131	2016-06-01	1	Female	44	ZAGHOUAN	2	16	Bone marrow transplant	No	No
132	2016-06-01	1	Male	35	JENDOUBA	3	18	Not specified	No	No
133	2016-06-01	1	Male	54	TUNIS	1	18	HIV infection	No	No
134	2016-06-01	1	Male	38	KAIROUAN	2	63	Bone marrow transplant	No	No
135	2016-06-01	2	Male	56	BEN AROUS	1	10	HIV infection	No	No
136	2016-06-01	1	Female	33	CONGO	3	10	Not specified	Yes	No
137	2016-06-01	1	Female	39	KAIROUAN	1	12	Kidney transplant	No	No
138	2016-06-01	2	Male	56	TATAOUINE	1	58	HIV infection	Yes	Yes	Enterocytozoon bieneusi	WL12
139	2016-06-01	3	Male	1	TUNIS	1	34	HIV infection	Yes	Yes	Enterocytozoon bieneusi	WL12
140	2016-07-01	1	Male	45	NABEUL	1	8	HIV infection	No	No
141	2016-07-01	1	Male	43	BEN AROUS	1	17	HIV infection	Yes	No
142	2016-07-01	2	Female	47	ZAGHOUAN	2	23	Bone marrow transplant	No	No
143	2016-08-01	1	Male	27	MALI	1	5	HIV infection	No	No
144	2016-08-01	1	Male	62	TUNIS	2	32	Bone marrow transplant	No	No
145	2016-08-01	1	Male	61	TUNIS	1	39	HIV infection	No	No
146	2016-08-01	1	Male	76	TOZEUR	1	26	HIV infection	No	No
147	2016-08-01	1	Female	36	MAHDIA	2	10	Bone marrow transplant	No	No
148	2016-09-01	1	Male	Not specified	NABEUL	1	8	Kidney transplant	No	No
149	2016-09-01	1	Male	52	SOUSSE	1	9	Kidney transplant	No	No
150	2016-09-01	1	Female	55	BEN AROUS	1	17	Kidney transplant	No	No
151	2016-09-01	1	Female	66	KASSERINE	1	36	Kidney transplant	No	No
152	2016-09-01	1	Female	42	IVORY COAST	1	29	HIV infection	Yes	Yes	Enterocytozoon bieneusi	WL12-like
153	2016-09-01	1	Female	Not specified	TUNIS	2	17	Bone marrow transplant	No	No
154	2016-09-01	1	Female	9	MANOUBA	2	48	Bone marrow transplant	No	No
155	2016-09-01	2	Female	Not specified	SOUSSE	2	36	Bone marrow transplant	No	No
156	2016-09-01	1	Male	27	TUNIS	2	5	Bone marrow transplant	No	No
157	2016-09-01	1	Female	32	MONASTIR	2	10	Bone marrow transplant	No	No
158	2016-09-01	1	Male	2	TUNIS	4	13	Not specified	No	No
159	2016-10-01	1	Female	2	MANOUBA	2	16	Bone marrow transplant	Yes	No
160	2016-10-01	1	Male	48	IVORY COAST	1	14	HIV infection	No	No
161	2016-10-01	1	Female	20	TUNIS	1	42	Kidney transplant	Yes	No
162	2016-10-01	1	Female	8	TUNIS	2	32	Bone marrow transplant	No	No
163	2016-10-01	2	Male	38	TUNIS	1	17	HIV infection	No	No
164	2016-11-01	1	Male	28	MAURITANIA	1	8	HIV infection	No	No
165	2016-11-01	2	Male	15	TUNIS	2	28	Bone marrow transplant	No	No
166	2016-11-01	1	Male	10	MAHDIA	2	6	Bone marrow transplant	No	No
167	2016-11-01	1	Female	56	TUNIS	1	10	HIV infection	No	No
168	2016-12-01	1	Male	65	SOUSSE	1	6	Kidney transplant	No	No
169	2016-12-01	1	Female	48	HAMMAMET	1	23	HIV infection	No	No
170	2016-12-01	1	Female	5	TUNIS	2	13	Bone marrow transplant	No	No
171	2016-12-01	3	Male	9	TUNIS	2	120	Bone marrow transplant	Yes	No

## Sheet: Table S2
Targeted species	Amplified region	Primer name	Primer sequence (5'-3')	Amplicon size (bp)	References (detailed below)
Microsporidia	18S	C1	CACCAGGTTGATTCTGCC	1200	[1] and [7]
		C2	GTGACGGGCGGTGTGTAC
Enterocytozoon bieneusi	18S	EBIEF	GAAACTTGTCCACTCCTTACG	607	[2], [7] and [8]
		EBIER	CCATGCACCACTCCTGCCATT
Encephalitozoon intestinalis	18S	V1	CACCAGGTTGATTCTGCCTGAC	370	[3] and [7]
		SI500	CTCGCTCCTTTACACTCG
Encephalitozoon cuniculi	18S	ECUNF	ATGAGAAGTGATGTGTGTGTGCG	549	[4] and [7]
		ECUNR	TGCCATGCACTCACAGGCATC
Encephalitozoon hellem	18S	EHELF	TGAGAAGTAAGATGTTTAGCA	547	[5] and [7]
		EHELR	GTAAAAACACTCTCACACTCA
Enterocytozoon bieneusi	ITS	EBITS3	GGTCATAGGGATGAAGAG	435	[6] and [8]
		EBITS4	TTCGAGTTCTTTCGCGCTC
		EBITS1	GCTCTGAATATCTATGGCT	390
		EBITS2.4	ATCGCCGACGGATCCAAGTG
[1] Raynaud et al. (1998) J Clin Microbiol. 36(1):37-40; doi: 10.1128/JCM.36.1.37-40.1998.
[2] da Silva et al. (1997) Arch Pathol Lab Med. 121(8):874-9.
[3] Weiss et al. (1994) Folia Parasitol. (Praha) 41(2):81-90.
[4] de Groot et al. (1995) J Infect Dis. 171(5):1375-8; doi: 10.1093/infdis/171.5.1375.
[5] Visvesvara et al. (1994) J Clin Microbiol. 1994 Nov;32(11):2760-8; doi: 10.1128/JCM.32.11.2760-2768.1994.
[6] Buckholt et al. (2002) Appl Environ Microbiol. 68(5):2595-9; doi: 10.1128/aem.68.5.2595-2599.2002.
[7] Valenčáková & Sučik (2020) J Fungi (Basel) 6(3):114; doi: 10.3390/jof6030114.
[8] Li et al. (2019) Trends Parasitol. 35(6):436-451; doi: 10.1016/j.pt.2019.04.004.
